# Supplementary material
Source: PubMed Central journal article supplement (PMC6306678)
Supplement: Supp_Table1.pdf [file Supp_Table1.pdf]

## Supplementary Data

SUPPLEMENTARY TABLE S1. BASELINE CORRELATIONS

|                  | Grade    |        |        |        | Visual attention |        |        |        | Fidgeting |          |        |        |        |       |
|------------------|----------|--------|--------|--------|------------------|--------|--------|--------|-----------|----------|--------|--------|--------|-------|
|                  | All ADHD | ADHD-C | ADHD-I | Contr. | FS               | ADHD-C | ADHD-I | Contr. | FS        | All ADHD | ADHD-C | ADHD-I | Contr. | FS    |
| Grade            |          |        |        |        |                  |        |        |        |           |          |        |        |        |       |
| Visual attention | 0.11     | 0.09   | 0.09   | 0.21   | 0.15             |        |        |        |           |          |        |        |        |       |
| Fidgeting        | -0.15    | -0.21  | -0.10  | -0.37* | -0.22*           | -0.35* | -0.46* | -0.22  | -0.37*    | 0.05     | 0.03   | 0.03   | 0.07   | -0.03 |
| Accuracy         | 0.47*    | 0.51*  | 0.47*  | 0.38*  | 0.43*            | -0.10  | 0.15   | 0.43*  | 0.13      | 0.05     | 0.03   | 0.03   | 0.07   | -0.03 |

\* $p < 0.05$ .

ADHD All, attention-deficit/hyperactivity disorder all subtypes; ADHD-C, ADHD Combined Subtype; ADHD-I, ADHD Inattentive Subtype; Contr., Control group; FS, full sample; Grade, Grade in school.
