# Supplementary material
Source: PubMed Central journal article supplement (PMC6306678)
Supplement: Supp_Table2.pdf [file Supp_Table2.pdf]

SUPPLEMENTARY TABLE S2. MEDICATION TITRATION TRIAL CORRELATIONS

|                  | Grade    |        |        | Visual attention |        |        | Fidgeting |        |        |
|------------------|----------|--------|--------|------------------|--------|--------|-----------|--------|--------|
|                  | ADHD-All | ADHD-C | ADHD-I | ADHD-All         | ADHD-C | ADHD-I | ADHD-All  | ADHD-C | ADHD-I |
| MPH group        |          |        |        |                  |        |        |           |        |        |
| Grade            |          | 0.28   | 0.23   |                  |        |        |           |        |        |
| Visual attention | 0.27     | -0.23  | -0.17  | -0.43*           | -0.64* | -0.21  |           |        |        |
| Fidgeting        | -0.20    | 0.60*  | 0.50*  | 0.27             | 0.18   | 0.39*  | -0.27     | -0.30  | -0.22  |
| Accuracy         | 0.53*    |        |        |                  |        |        |           |        |        |
| Placebo group    |          |        |        |                  |        |        |           |        |        |
| Grade            |          | -0.32  | -0.11  |                  |        |        |           |        |        |
| Visual attention | -0.21    | -0.03  | 0.05   | -0.15            | -0.29  | -0.02  |           |        |        |
| Fidgeting        | 0.02     | -0.06  | 0.34   | 0.07             | 0.07   | 0.08   | 0.34*     | 0.31   | 0.35   |
| Accuracy         | 0.18     |        |        |                  |        |        |           |        |        |

\* $p < 0.05$ .

ADHD, attention-deficit/hyperactivity disorder; ADHD-C, ADHD-Combined Subtype; ADHD-I, ADHD-Inattentive Subtype; Grade, Grade in school; MPH, methylphenidate.
